# Supplementary material for: Neolithic hydroclimatic change and water resources exploitation in the Fertile Crescent
Source: Research Square preprint supplement (doi:10.21203/rs.3.rs-1525061/v1), 2022-04-08
Supplement: Supplementary file 2 [file 8f440cc8385a9e9d6213feb3.xlsx]

## Sheet: Table S1-Ages
Sample ID		Mass/g	238U (ppb)	2SE	238/V	dft (mm)	95%err	230Th/238U	95% ext.	234U/238U	95% ext.	Age unc (ka)	95%err	232Th/238U	2SE	(230Th/232Th)i	2sd	230Th/232Th	Age cr Ka	2se
LoNAP514	A	0.199	246.092	18.4577	12.7467	0	2	0.0626573	0.000416259	1.04833	0.00183091	6.72229	0.0458356	3.54078e-05	4.58518e-07	1.5	1.5	1769.59	6.7168	0.0460873
LoNAP514	4	0.075	258.06	19.3586	3.06089	4	1.5	0.0640647	0.00059101	1.0482	0.00161862	6.87799	0.067546	0.000133851	2.5772e-06	1.5	1.5	478.628	6.85722	0.0705254
LoNAP514	top	0.178	238.167	17.8635	9.46508	8.1	2	0.0657321	0.000425909	1.0503	0.00178111	7.04042	0.0461164	3.90119e-05	1.0194e-06	1.5	1.5	1684.92	7.03447	0.0462491
LoNAP514	F	0.056	224.294		4.46599	15	1.5	0.0715543	0.000727549	1.0562	0.0016486	7.64552	0.0810179	3.62621e-05	7.25242e-07	1.5	1.5	1973.25	7.63879	0.0806433
LoNAP514	G	0.076	238.167		6.55498	25	1.5	0.0798946	0.000650249	1.06254	0.00147053	8.51795	0.0730678	0.000266336	5.32672e-06	1.5	1.5	299.977	8.47712	0.0841093
LoNAP514	B	0.062	240.287		2.5007	28.4	1.5	0.0806518	0.00102705	1.06466	0.00214937	8.58355	0.114207	0.000271646	5.43291e-06	1.5	1.5	296.901	8.54105	0.122787
LoNAP514	35	0.121	236.117	17.7101	4.60818	35	1.5	0.0811405	0.000689915	1.06465	0.00110801	8.63357	0.0774501	0.000127598	2.02717e-06	1.5	1.5	635.908	8.61485	0.0808744
LoNAP514	30	0.063	254.537		2.68804	37.6	1.5	0.0819244	0.00100158	1.06707	0.00209935	8.70386	0.111372	8.33545e-05	1.66709e-06	1.5	1.5	982.843	8.69156	0.112979
LoNAP514	42	0.136	244.074	18.3068	5.21305	42	1.5	0.0839096	0.000509289	1.06853	0.00117819	8.90959	0.0556491	0.000142646	1.60994e-06	1.5	1.5	588.237	8.88813	0.060895
LoNAP514	C	0.057	253.947		2.49391	54.9	1.5	0.0858935	0.00106362	1.07422	0.00216396	9.07904	0.119211	0.000302224	6.04447e-06	1.5	1.5	284.205	9.03447	0.125918
LoNAP514	H	0.06	262.829		5.21724	60	1.5	0.0856805	0.000748005	1.07309	0.00158519	9.06638	0.0842374	2.05338e-05	4.10677e-07	1.5	1.5	4172.65	9.0628	0.0832247
LoNAP514	54	0.05	181.572		1.44013	73.2	1.5	0.0935249	0.0014405	1.08694	0.00267956	9.80014	0.1578	0.00012108	2.4216e-06	1.5	1.5	772.423	9.78216	0.159478
LoNAP515	D	0.134	177.489	13.3128	6.26173	81.3	1.5	0.100818	0.000554537	1.08998	0.00189261	10.5681	0.0686711	0.000144849	2.26738e-06	1.5	1.5	696.023	10.5461	0.0719122
LoNAP514	19*	0.142	206.697	15.5035	4.72104	19	1.5	0.0826044	0.000585982	1.0611	0.00175616	8.83032	0.068675	0.000178214	3.65719e-06	1.5	1.5	463.513	8.80323	0.0740627
LoNAP514	65*	0.037	170.876	12.8259	0.974514	65	1.5	0.0948545	0.000863898	1.09003	0.00288819	9.92131	0.102672	0.000461189	8.43041e-06	1.5	1.5	205.674	9.85177	0.124026

## Sheet: Table S2-Isotopes and age model
Age (ka)*	Age yr*	Age yr BCE	uncertainty (yr)	δ13C	δ18O
6.64647	6646.47	4626.47	165.294	-6.349	-7.97		* before 2020
6.66	6660	4640	141.765	-6.3	-8.185
6.67	6670	4650	115	-6.696	-8.192
6.69	6690	4670	93.2353	-6.952	-8.24
6.7	6700	4680	77.0588	-7.35	-7.925
6.71	6710	4690	72.6471	-7.813	-7.89
6.72	6720	4700	70	-8.14	-8.012
6.73	6730	4710	70.8824	-7.95	-7.959
6.74941	6749.41	4729.41	75	-7.573	-7.8
6.76	6760	4740	80	-7.47	-7.669
6.76471	6764.71	4744.71	80	-6.925	-7.42
6.77824	6778.24	4758.24	84.1176	-6.9273	-7.905
6.78118	6781.18	4761.18	85	-7.825	-8.21
6.795	6795	4775	85	-7.849	-8.22
6.80824	6808.24	4788.24	85	-7.53	-8.43
6.82	6820	4800	85	-7.732	-8.543
6.82529	6825.29	4805.29	85	-7.8	-8.32
6.83824	6838.24	4818.24	85	-8.195	-8.375
6.85	6850	4830	85	-7.807	-8.244
6.85471	6854.71	4834.71	82.6471	-8.17	-8.11
6.86824	6868.24	4848.24	84.1176	-7.7287	-7.84
6.88	6880	4860	85	-7.439	-7.979
6.88471	6884.71	4864.71	85	-6.811	-7.762
6.89824	6898.24	4878.24	89.1176	-6.578	-7.813
6.90176	6901.76	4881.76	95	-6.701	-7.791
6.91471	6914.71	4894.71	99.7059	-7.113	-8.165
6.92	6920	4900	109.118	-7.308	-8.102
6.93118	6931.18	4911.18	121.176	-7.254	-8.152
6.94471	6944.71	4924.71	132.353	-7.136	-8.038
6.95	6950	4930	139.118	-7.07	-7.805
6.96118	6961.18	4941.18	150	-7.173	-8.008
6.97941	6979.41	4959.41	152.353	-7.587	-8.23
6.99824	6998.24	4978.24	163.235	-7.421	-8.287
7.02118	7021.18	5001.18	170.588	-7.159	-8.347
7.03941	7039.41	5019.41	177.353	-7.003	-8.45
7.05765	7057.65	5037.65	183.824	-6.643	-7.796
7.08118	7081.18	5061.18	190	-6.333	-7.95
7.09941	7099.41	5079.41	192.353	-5.998	-7.885
7.11765	7117.65	5097.65	195	-5.176	-7.65
7.14235	7142.35	5122.35	200	-5.019	-7.48
7.16412	7164.12	5144.12	200	-5.572	-7.417
7.17765	7177.65	5157.65	196.176	-6.054	-7.749
7.20118	7201.18	5181.18	200	-6.344	-7.76
7.21824	7218.24	5198.24	200	-6.22	-7.62
7.23765	7237.65	5217.65	200	-6.218	-7.91
7.25235	7252.35	5232.35	200	-6.246	-7.792
7.27412	7274.12	5254.12	200	-6.48	-7.92
7.29529	7295.29	5275.29	200	-6.851	-8.11
7.31118	7311.18	5291.18	194.706	-7.45	-8.458
7.33412	7334.12	5314.12	190	-7.632	-8.501
7.35529	7355.29	5335.29	190	-7.609	-8.31
7.37118	7371.18	5351.18	185.294	-7.641	-8.322
7.39412	7394.12	5374.12	190	-7.598	-8.26
7.41529	7415.29	5395.29	186.176	-7.564	-8.069
7.43118	7431.18	5411.18	184.706	-7.13	-8.08
7.45412	7454.12	5434.12	180	-6.672	-7.926
7.47412	7474.12	5454.12	180	-6.492	-7.762
7.49118	7491.18	5471.18	180	-6.597	-7.805
7.51824	7518.24	5498.24	182.059	-7.033	-8.076
7.53706	7537.06	5517.06	185	-7.345	-8.01
7.56118	7561.18	5541.18	190.294	-7.551	-8.33
7.58353	7583.53	5563.53	195	-7.244	-8.249
7.60412	7604.12	5584.12	198.529	-7.22	-8.2
7.62118	7621.18	5601.18	200	-7.255	-8.29
7.64353	7643.53	5623.53	201.765	-7.681	-8.387
7.66412	7664.12	5644.12	205	-8.526	-8.83
7.68118	7681.18	5661.18	200.294	-8.328	-8.29
7.70353	7703.53	5683.53	205	-7.725	-8.42
7.72412	7724.12	5704.12	208.529	-7.626	-8.374
7.74	7740	5720	210	-7.202	-8.39
7.76353	7763.53	5743.53	216.765	-7.21	-8.01
7.78882	7788.82	5768.82	220	-8.282	-8.199
7.80588	7805.88	5785.88	225.882	-9.481	-8.7
7.83176	7831.76	5811.76	230.882	-8.767	-8.412
7.84765	7847.65	5827.65	235	-8.18	-8.26
7.87353	7873.53	5853.53	245	-8.086	-8.069
7.88941	7889.41	5869.41	245	-7.601	-7.95
7.91588	7915.88	5895.88	245	-7.611	-7.99
7.93353	7933.53	5913.53	250	-7.13	-7.855
7.95765	7957.65	5937.65	250	-7.112	-7.95
7.97706	7977.06	5957.06	251.765	-7.016	-7.826
8	8000	5980	255	-8.118	-8.316
8.01588	8015.88	5995.88	250	-8.798	-8.56
8.04176	8041.76	6021.76	250	-9.271	-8.572
8.05765	8057.65	6037.65	246.176	-9.563	-8.799
8.07824	8078.24	6058.24	245	-9.68	-9.054
8.1	8100	6080	245	-9.681	-8.998
8.12176	8121.76	6101.76	237.059	-9.159	-8.65
8.14176	8141.76	6121.76	234.118	-8.525	-8.048
8.16647	8166.47	6146.47	230	-8.668	-8.164
8.18824	8188.24	6168.24	222.941	-9.217	-8.514
8.21	8210	6190	220	-9.534	-8.577
8.23588	8235.88	6215.88	212.059	-9.231	-8.56
8.26176	8261.76	6241.76	209.118	-9.03	-8.625
8.28647	8286.47	6266.47	200.882	-9.222	-8.62
8.30824	8308.24	6288.24	192.941	-9.672	-8.747
8.33	8330	6310	185	-9.634	-8.708
8.35588	8355.88	6335.88	167.059	-9.215	-8.535
8.37471	8374.71	6354.71	152.647	-9.076	-8.647
8.39824	8398.24	6378.24	136.765	-9.108	-8.71
8.40412	8404.12	6384.12	115.882	-8.85	-8.777
8.42	8420	6400	100	-9.113	-8.835
8.42	8420	6400	91.7647	-9.77	-9.094
8.43	8430	6410	83.8235	-9.799	-9.26
8.43	8430	6410	80	-9.562	-8.839
8.44	8440	6420	80	-9.178	-8.311
8.44059	8440.59	6420.59	75.2941	-9.351	-8.463
8.45	8450	6430	80	-9.38	-8.721
8.45235	8452.35	6432.35	83.8235	-9.068	-8.853
8.46	8460	6440	80	-8.546	-9.156
8.46412	8464.12	6444.12	85	-8.32	-9.169
8.47	8470	6450	85	-8.117	-8.86
8.47647	8476.47	6456.47	85	-7.901	-8.611
8.48	8480	6460	83.8235	-8.068	-8.527
8.48	8480	6460	80	-8.536	-8.746
8.49	8490	6470	82.3529	-8.605	-8.746
8.49	8490	6470	80	-8.411	-8.92
8.49	8490	6470	80	-8.381	-8.671
8.5	8500	6480	75	-8.04	-8.283
8.5	8500	6480	75	-7.358	-7.984
8.5	8500	6480	70	-7.102	-8.139
8.51	8510	6490	70	-6.76	-8.1
8.51	8510	6490	66.7647	-6.954	-8.24
8.51	8510	6490	66.4706	-7.155	-8.42
8.51	8510	6490	70	-7.179	-8.68
8.51471	8514.71	6494.71	65	-6.918	-8.39
8.52	8520	6500	65	-7.07	-8.3
8.52	8520	6500	65	-7.226	-8.07
8.52	8520	6500	65	-6.98	-8.587
8.52	8520	6500	65	-6.828	-8.411
8.53	8530	6510	65	-6.868	-8.4
8.53	8530	6510	69.7059	-7.618	-8.772
8.53	8530	6510	65	-8.065	-9.237
8.54	8540	6520	70	-7.328	-9.13
8.54	8540	6520	70	-6.416	-8.83
8.54471	8544.71	6524.71	67.3529	-6.338	-8.332
8.55118	8551.18	6531.18	70.5882	-6.45	-8.307
8.56	8560	6540	75	-6.878	-8.059
8.56294	8562.94	6542.94	76.4706	-6.846	-7.939
8.57	8570	6550	80	-6.033	-7.71
8.58	8580	6560	82.6471	-5.132	-7.77
8.59	8590	6570	90	-5.667	-7.843
8.59706	8597.06	6577.06	93.5294	-6.256	-7.932
8.60294	8602.94	6582.94	95	-5.995	-8.033
8.61	8610	6590	99.4118	-5.924	-8.08
8.62529	8625.29	6605.29	102.353	-6.501	-8.062
8.64	8640	6620	105	-6.855	-8.15
8.64706	8647.06	6627.06	105	-6.677	-8.111
8.66294	8662.94	6642.94	105	-6.521	-8.154
8.67941	8679.41	6659.41	100.294	-6.904	-8.456
8.68529	8685.29	6665.29	97.3529	-7.11	-8.566
8.7	8700	6680	99.4118	-6.683	-8.4
8.70706	8707.06	6687.06	95	-6.714	-8.47
8.72	8720	6700	95	-6.492	-8.536
8.72941	8729.41	6709.41	90.2941	-6.205	-8.21
8.74529	8745.29	6725.29	87.3529	-6.985	-7.926
8.75118	8751.18	6731.18	90	-7.364	-8.19
8.76765	8767.65	6747.65	86.1765	-6.458	-8.2
8.77353	8773.53	6753.53	85	-6.012	-8.17
8.78941	8789.41	6769.41	85	-5.978	-8.2
8.79529	8795.29	6775.29	82.3529	-6.139	-7.986
8.81	8810	6790	75	-5.866	-8.19
8.81765	8817.65	6797.65	71.1765	-4.973	-7.895
8.82	8820	6800	65	-4.964	-7.72
8.82941	8829.41	6809.41	65	-5.388	-7.67
8.83	8830	6810	60	-6.033	-8.168
8.83176	8831.76	6811.76	60	-5.65	-8.14
8.84	8840	6820	60	-5.73	-8
8.84	8840	6820	60	-5.973	-8
8.84	8840	6820	60	-6.196	-8.11
8.85	8850	6830	60	-5.074	-7.71
8.85	8850	6830	60	-5.895	-7.911
8.85	8850	6830	60	-4.809	-7.326
8.85	8850	6830	60	-5.676	-7.67
8.85	8850	6830	62.3529	-6	-8.22
8.85	8850	6830	63.2353	-5.636	-8.05
8.86	8860	6840	60	-5.893	-7.93
8.86	8860	6840	60	-5.585	-7.85
8.86	8860	6840	60	-6.267	-8.065
8.86	8860	6840	65	-5.694	-7.995
8.86	8860	6840	65	-6.327	-7.9
8.86353	8863.53	6843.53	66.7647	-5.159	-7.72035
8.87	8870	6850	65	-6.014	-7.78
8.87	8870	6850	65	-5.331	-7.53
8.87	8870	6850	65	-6.575	-7.917
8.87	8870	6850	65.8824	-6.821	-8.09
8.87	8870	6850	70	-6.094	-7.964
8.88	8880	6860	70	-6.192	-7.83
8.88	8880	6860	74.7059	-5.264	-7.463
8.89	8890	6870	70	-5.615	-7.316
8.89	8890	6870	75	-7.174	-7.89
8.89882	8898.82	6878.82	75	-6.217	-7.915
8.9	8900	6880	80	-6.618	-8.42
8.9	8900	6880	75	-5.772	-7.97
8.91	8910	6890	80	-5.669	-7.77
8.91	8910	6890	80	-6.527	-7.47
8.92	8920	6900	85	-6.692	-8.735
8.92529	8925.29	6905.29	87.6471	-6.829	-8.74
8.93	8930	6910	85	-7.317	-8.803
8.94	8940	6920	90	-6.606	-8.6
8.94353	8943.53	6923.53	95	-5.53	-7.89
8.95	8950	6930	93.5294	-5.623	-8.005
8.96	8960	6940	88.8235	-6.536	-8.45
8.96	8960	6940	85	-6.791	-8.15
8.97	8970	6950	80	-7.011	-8.3
8.97	8970	6950	75	-6.426	-8.41
8.98	8980	6960	75	-7.527	-8.77
8.98	8980	6960	75	-6.784	-8.346
8.98	8980	6960	74.4118	-6.695	-8.544
8.99	8990	6970	75	-7.09	-8.85
9	9000	6980	88.8235	-7.522	-8.86
9.01	9010	6990	108.529	-8.081	-9
9.03647	9036.47	7016.47	131.471	-8.047	-8.288
9.05588	9055.88	7035.88	150	-7.8507	-9.16
9.08529	9085.29	7065.29	162.647	-7.263	-8.76
9.11529	9115.29	7095.29	172.647	-6.943	-8.49
9.14471	9144.71	7124.71	180	-7.117	-8.65
9.17412	9174.12	7154.12	189.118	-7.27	-8.64
9.2	9200	7180	195	-7.052	-8.7
9.22294	9222.94	7202.94	201.471	-7.553	-8.73
9.25	9250	7230	210	-7.848	-8.798
9.27176	9271.76	7251.76	210.882	-7.841	-8.539
9.29118	9291.18	7271.18	219.412	-8.421	-8.83
9.32059	9320.59	7300.59	220	-8.86	-8.952
9.34	9340	7320	225	-8.727	-8.71
9.36941	9369.41	7349.41	225	-8.489	-8.91
9.38882	9388.82	7368.82	225	-8.262	-8.986
9.41824	9418.24	7398.24	225	-8.635	-9.135
9.43765	9437.65	7417.65	221.176	-8.415	-9.15
9.46706	9467.06	7447.06	221.471	-8.012	-9.558
9.48647	9486.47	7466.47	215	-8.346	-9.44
9.51588	9515.88	7495.88	210	-8.241	-9.24
9.53529	9535.29	7515.29	207.353	-7.701	-9.09
9.56471	9564.71	7544.71	202.647	-7.878	-8.82
9.59412	9594.12	7574.12	200	-8.037	-9.04
9.62353	9623.53	7603.53	196.765	-7.388	-8.861
9.65294	9652.94	7632.94	201.471	-7.309	-8.671
9.69235	9692.35	7672.35	210	-7.671	-9.138
9.74353	9743.53	7723.53	220	-7.834	-9.32
9.79235	9792.35	7772.35	225.588	-7.24	-8.42
9.84118	9841.18	7821.18	235.294	-8.039	-9.267
9.89	9890	7870	240	-7.887	-9.122
9.93882	9938.82	7918.82	239.706	-8.416	-8.953
9.97882	9978.82	7958.82	245	-8.58	-9.149
10.0265	10026.5	8006.47	245.882	-8.088	-9.052
10.0676	10067.6	8047.65	245	-7.3925	-9.13
10.1141	10114.1	8094.12	241.471	-7.706	-9.1645
10.1565	10156.5	8136.47	240	-7.976	-9.205
10.2018	10201.8	8181.76	232.059	-8.0765	-9.4
10.2429	10242.9	8222.94	225	-8.26	-9.09
10.2924	10292.4	8272.35	218.824	-8.353	-9.052
10.3418	10341.8	8321.76	210	-8.603	-9.047
10.3912	10391.2	8371.18	215.588	-8.845	-9.363
10.4406	10440.6	8420.59	215.882	-9.012	-9.46
10.49	10490	8470	211.765	-8.559	-9.307
10.5388	10538.8	8518.82	202.647	-7.86	-9.18
10.5976	10597.6	8577.65	212.353	-8.21	-9.51
10.6565	10656.5	8636.47	222.059	-7.742	-8.966
10.7153	10715.3	8695.29	231.765	-8.223	-9.37
10.7741	10774.1	8754.12	241.471	-8.347	-10.02
10.8329	10832.9	8812.94	251.176	-8.207	-9.268
10.8918	10891.8	8871.76	260.882	-8.194	-8.853
10.9506	10950.6	8930.59	270.588	-8.136	-8.602
